# Supplementary material for: Aberrant amino acid metabolism promotes neurovascular reactivity in rosacea
Source: JCI journal article supplement (doi:10.1172/jci.insight.161870), 2022-10-11

# Supplemental figures and figure legends

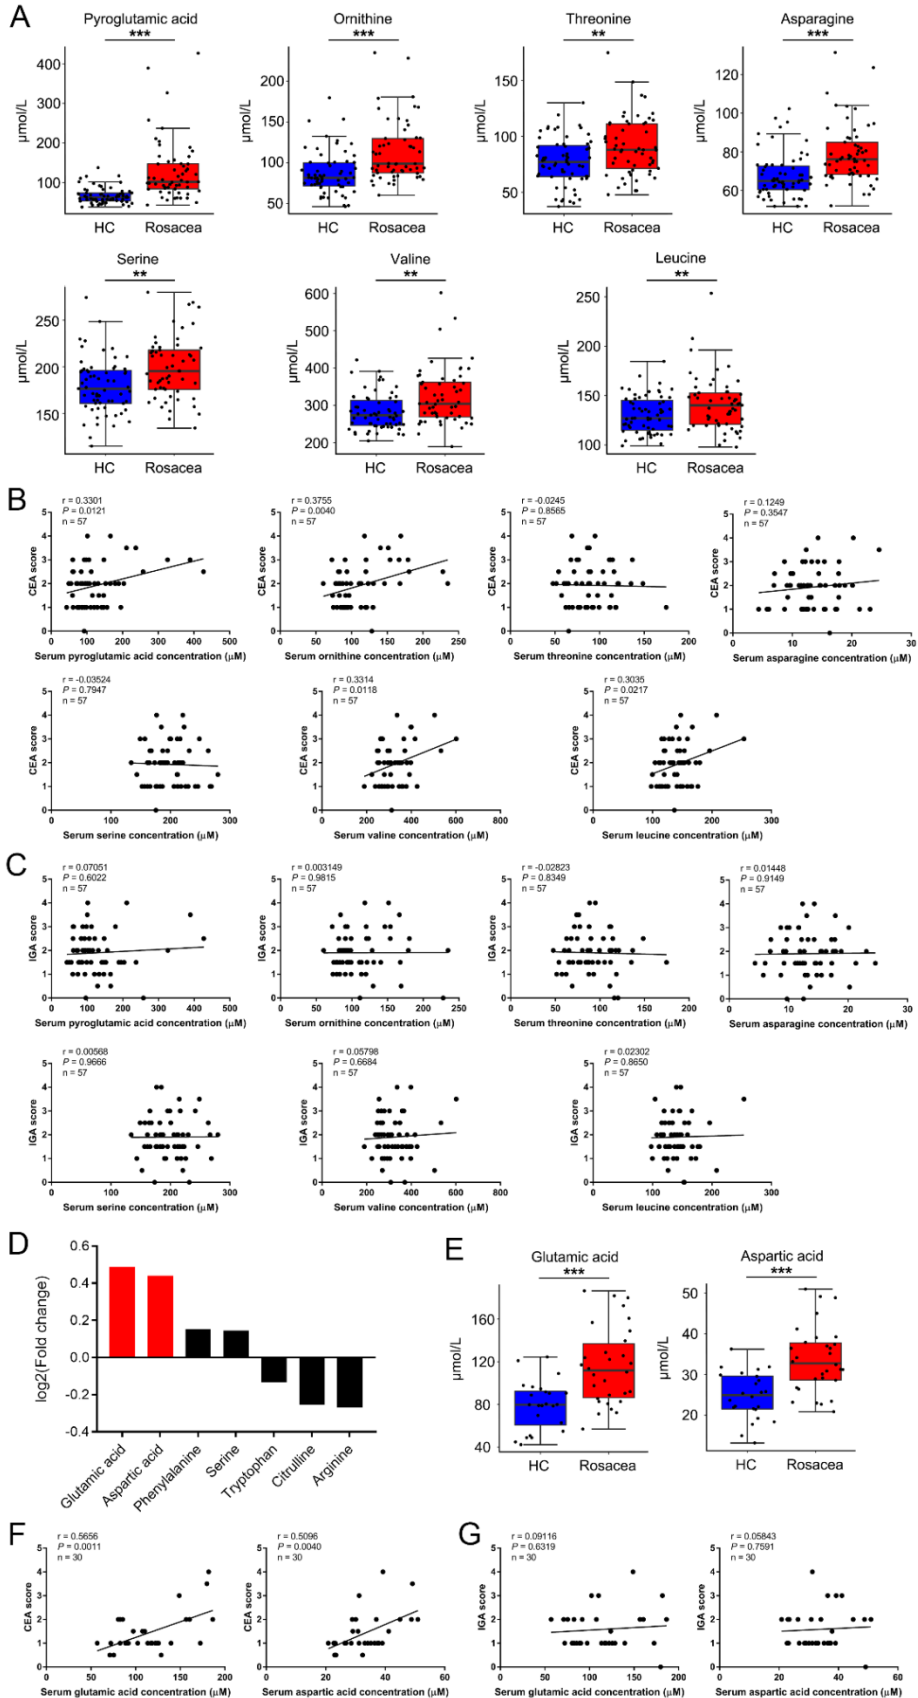

**Supplemental Figure 1. Expression changes of amino acids in serum of rosacea patients.**

(A) Boxplot of top 10 differential amino acids except glutamic acid, aspartic acid and GABA. HC, healthy control (blue) (n=63); Rosacea, rosacea patients (red) (n=57). (B) Correlation of serum amino acid levels in rosacea patients with Clinician's Erythema Assessment (CEA) scores. (C) Correlation of serum amino acid levels in rosacea patients with Investigator's Global Assessment (IGA) scores. (D) Expression changes of the top 7 differential metabolites in amino acids in the validation cohort. (E) Boxplot of glutamic acid and aspartic acid in the validation cohort. HC, healthy control (blue) (n=20); Rosacea, rosacea patients (red) (n=30). (F) Correlation of glutamic acid and aspartic acid levels in rosacea patients in the validation cohort with CEA scores. (G) Correlation of serum amino acid levels in rosacea patients in the validation cohort with IGA scores. Data represent the mean  $\pm$  SEM. \* $P < 0.05$ , \*\* $P < 0.01$ , \*\*\* $P < 0.001$ . 2-tailed unpaired Student's  $t$ -test or Mann-Whitney  $U$  test was performed to compare the differences in metabolite levels between the 2 groups (A and E). Spearman's correlation test was used for the correlation analysis (B, C, F and G).

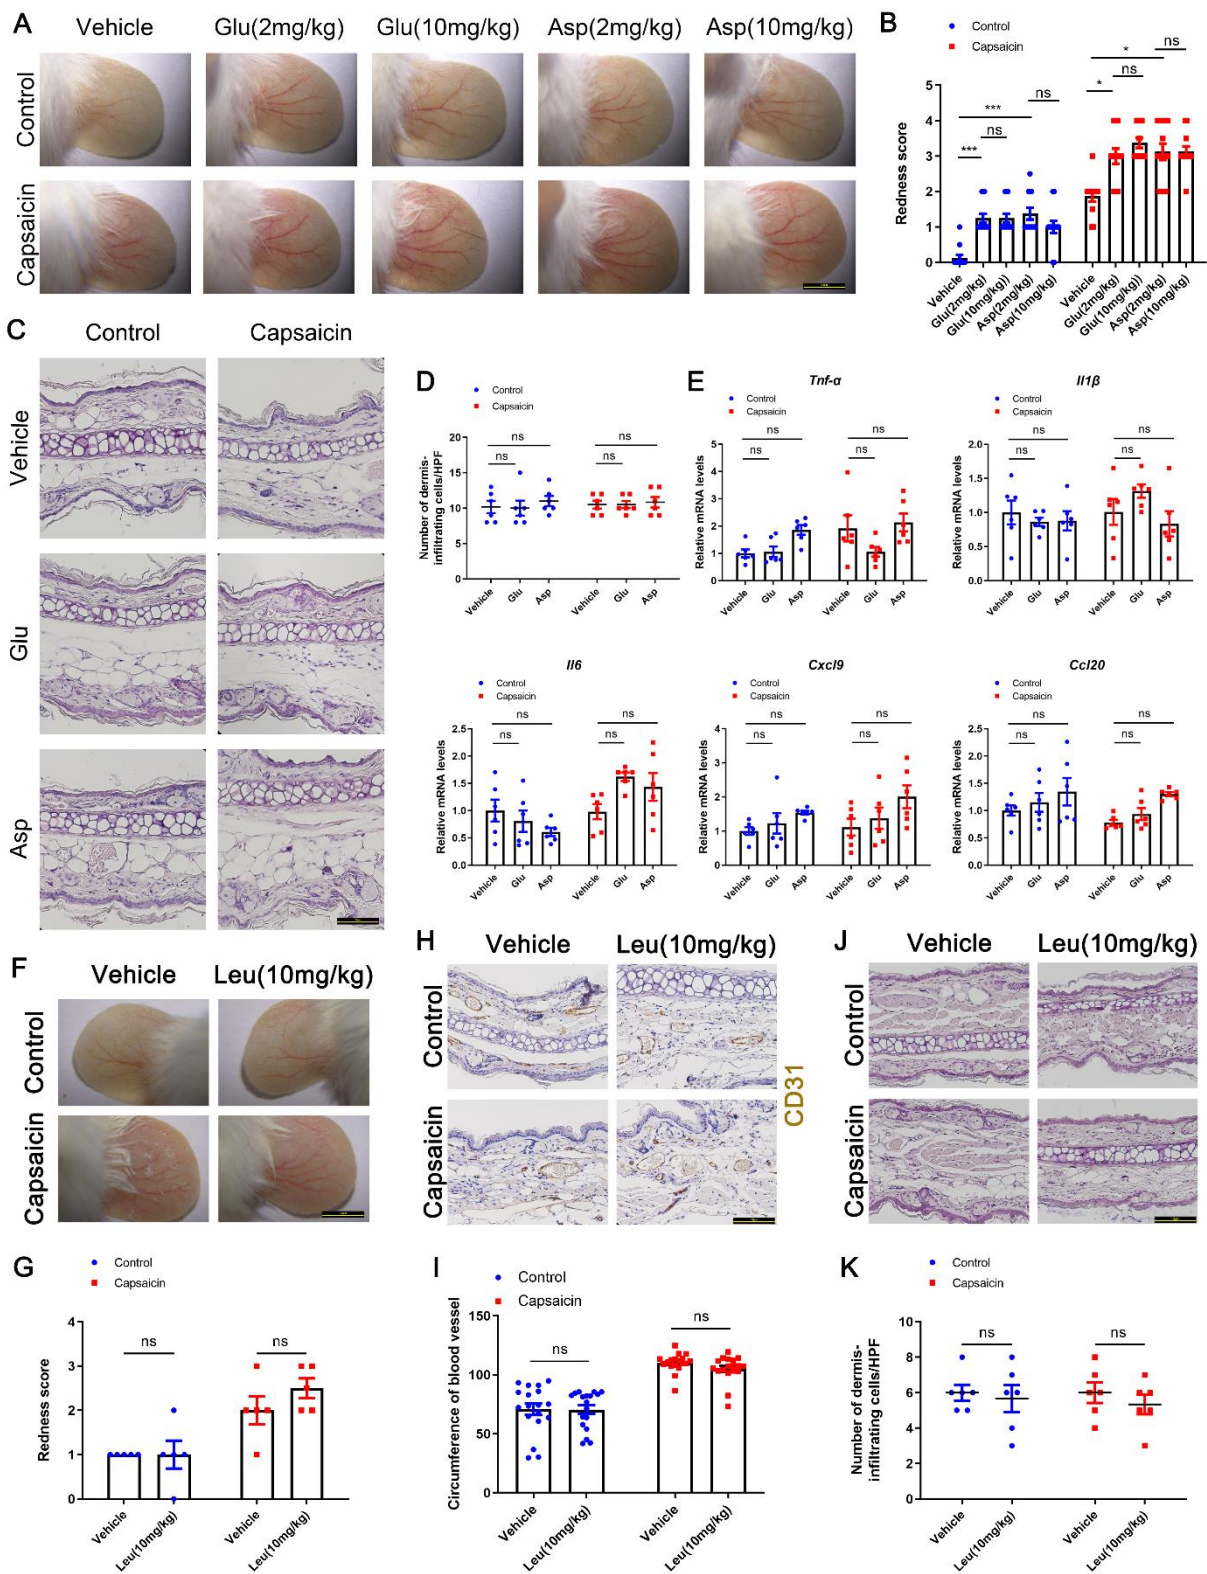

**Supplemental Figure 2. Glutamic acid and aspartic acid promote rosacea-like erythema and vasodilation in mice.**

(A) The ear of mice treated with different dose of glutamic acid and aspartic acid were smeared

with capsaicin or control vehicle (n = 6 for each group). Images were taken 30 min after capsaicin administration. Scale bar, 2mm (B) The severity of the rosacea-like phenotype was assessed on account of the redness score. (n=12 for each group). (C) HE staining of ear sections from different groups. (n = 6 for each group) (D) Dermal infiltrating cells were quantified (n = 6 for each group). (E) The mRNA expression levels of *Tnf- $\alpha$* , *Il1 $\beta$* , *Il6*, *Cxcl9*, *Ccl20* in ears. (F) The ear of mice treated with leucine were smeared with capsaicin or control vehicle (n = 5 for each group). Images were taken 30 min after capsaicin administration. Scale bar, 2mm. (G) The severity of the rosacea-like phenotype was assessed on account of the redness score (n=5 for each group). (H) IHC of CD31 on ear sections from mice. Scale bar, 100 $\mu$ m. (I) The circumference of blood vessels in each group was calculated (n=6 mice for each group). (J) HE staining of ear sections from different groups (n = 6 for each group). (K) Dermal infiltrating cells were quantified (n = 6 for each group). (Data represent the mean  $\pm$  SEM. \* $P < 0.05$ , \*\* $P < 0.01$ , \*\*\* $P < 0.001$ . ns, not significant. One-way ANOVA with Bonferroni's *post hoc* test was used (B, D, E, G, I and K).

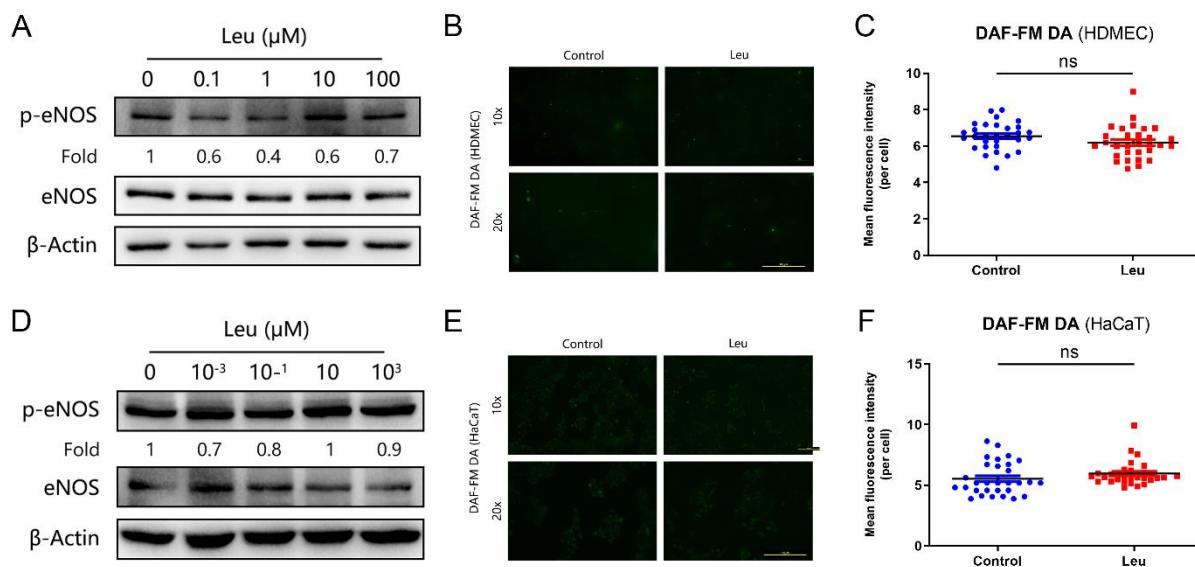

**Supplemental Figure 3. Leucine fails to stimulate the production of nitric oxide from endothelial cells and keratinocytes.** (A) Immunoblot analysis of the p-eNOS and total eNOS in cell lysates from HDMEC after leucine treatment.  $\beta$ -Actin is the loading control. p-eNOS protein levels were analyzed relative to total eNOS. (B) DAF-FM DA staining in HDMEC after leucine treatment. Scale bar, 100 $\mu$ m. (C) Quantification of intensity of DAF-FM DA fluorescence in HDMEC

under the designated treatments (n=30 cells). The quantification results are representative of at least 3 independent experiments. **(D)** Immunoblot analysis of the p-eNOS and total eNOS in cell lysates from HaCaT keratinocytes after leucine treatment.  $\beta$ -Actin is the loading control. p-eNOS protein levels were analyzed relative to total eNOS. **(E)** DAF-FM DA staining in HaCaT keratinocytes after leucine treatment. Scale bar, 100 $\mu$ m. **(F)** Quantification of intensity of DAF-FM DA fluorescence in HaCaT keratinocytes under the designated treatments (n=30 cells). The quantification results are representative of at least 3 independent experiments. All results are representative of at least three independent experiments. Data represent the mean  $\pm$  SEM. \*\*P < 0.01, \*\*\*P < 0.001. Two-tailed unpaired Student's t-test was used (C and F).

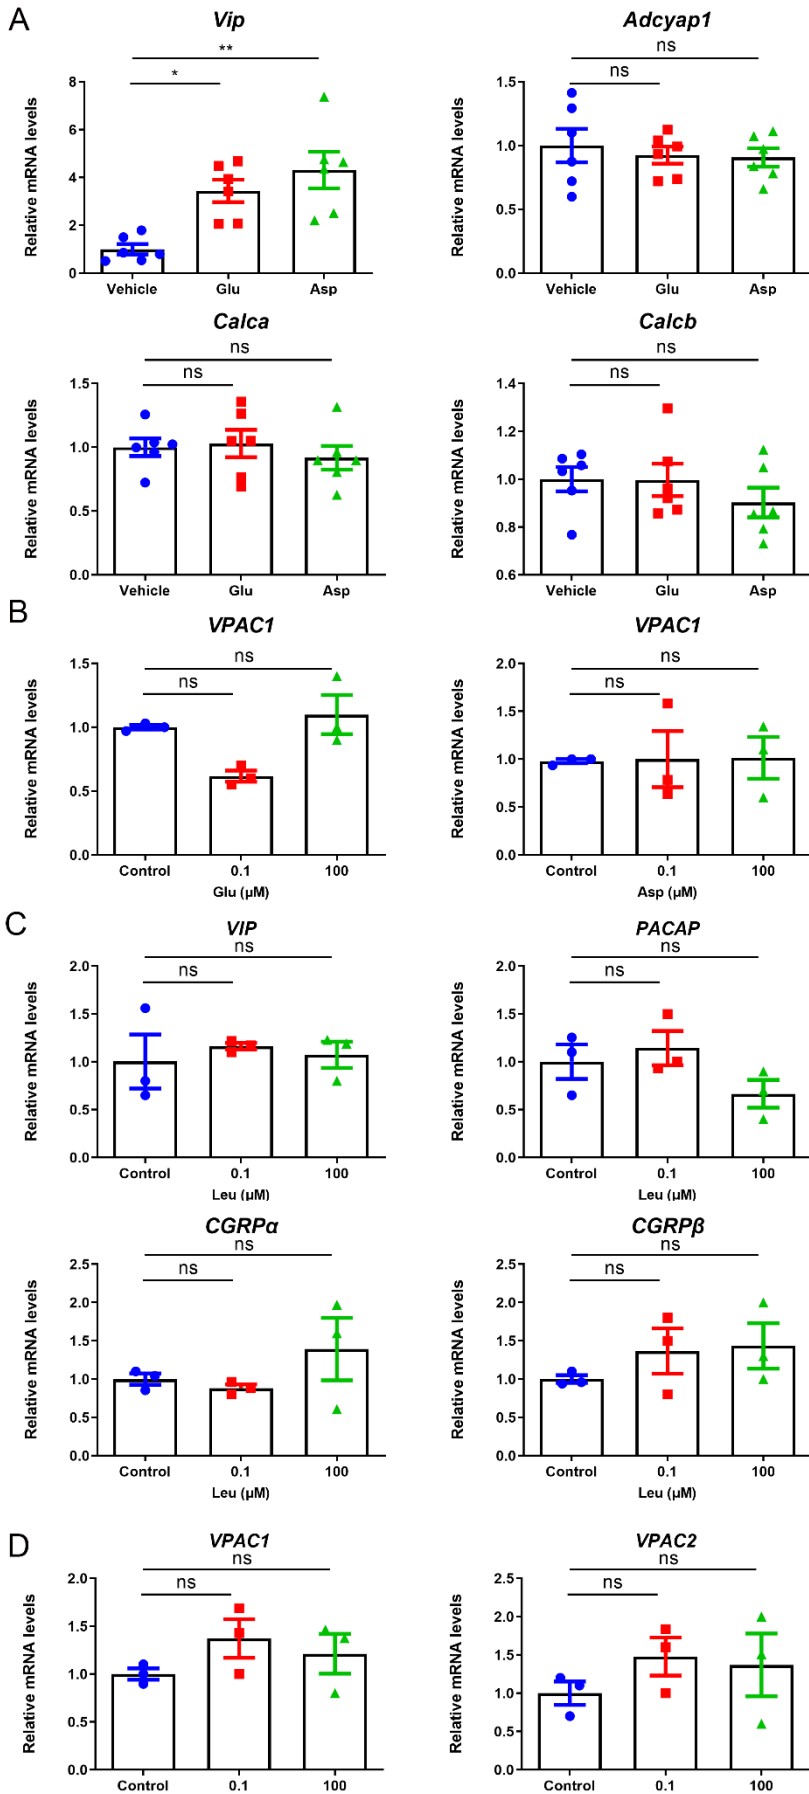

**Supplemental Figure 4. Glutamic acid and aspartic acid induce vasodilation-related neuropeptides from peripheral neuron.**

(A) The mRNA expression levels of *Vip*, *Adcyap1*, *Calca* and *Calcb* in DRG neurons from glutamic acid or aspartic acid gavage mice and control group. (B) The mRNA expression levels of *VPAC1* in HDMEC after glutamic acid or aspartic acid treatment. (C) The mRNA expression levels of *VIP*, *PACAP*, *CGRP $\alpha$*  and *CGRP $\beta$*  in HaCaT keratinocytes after leucine treatment (n=3 for each group). (D) The mRNA expression levels of *VPAC1* and *VPAC2* in HDMEC after leucine treatment (n=3 for each group). Data represent the mean  $\pm$  SEM. \**P* < 0.05, \*\**P* < 0.01, ns, not significant. One-way ANOVA with Bonferroni's *post hoc* test was used (A-D).

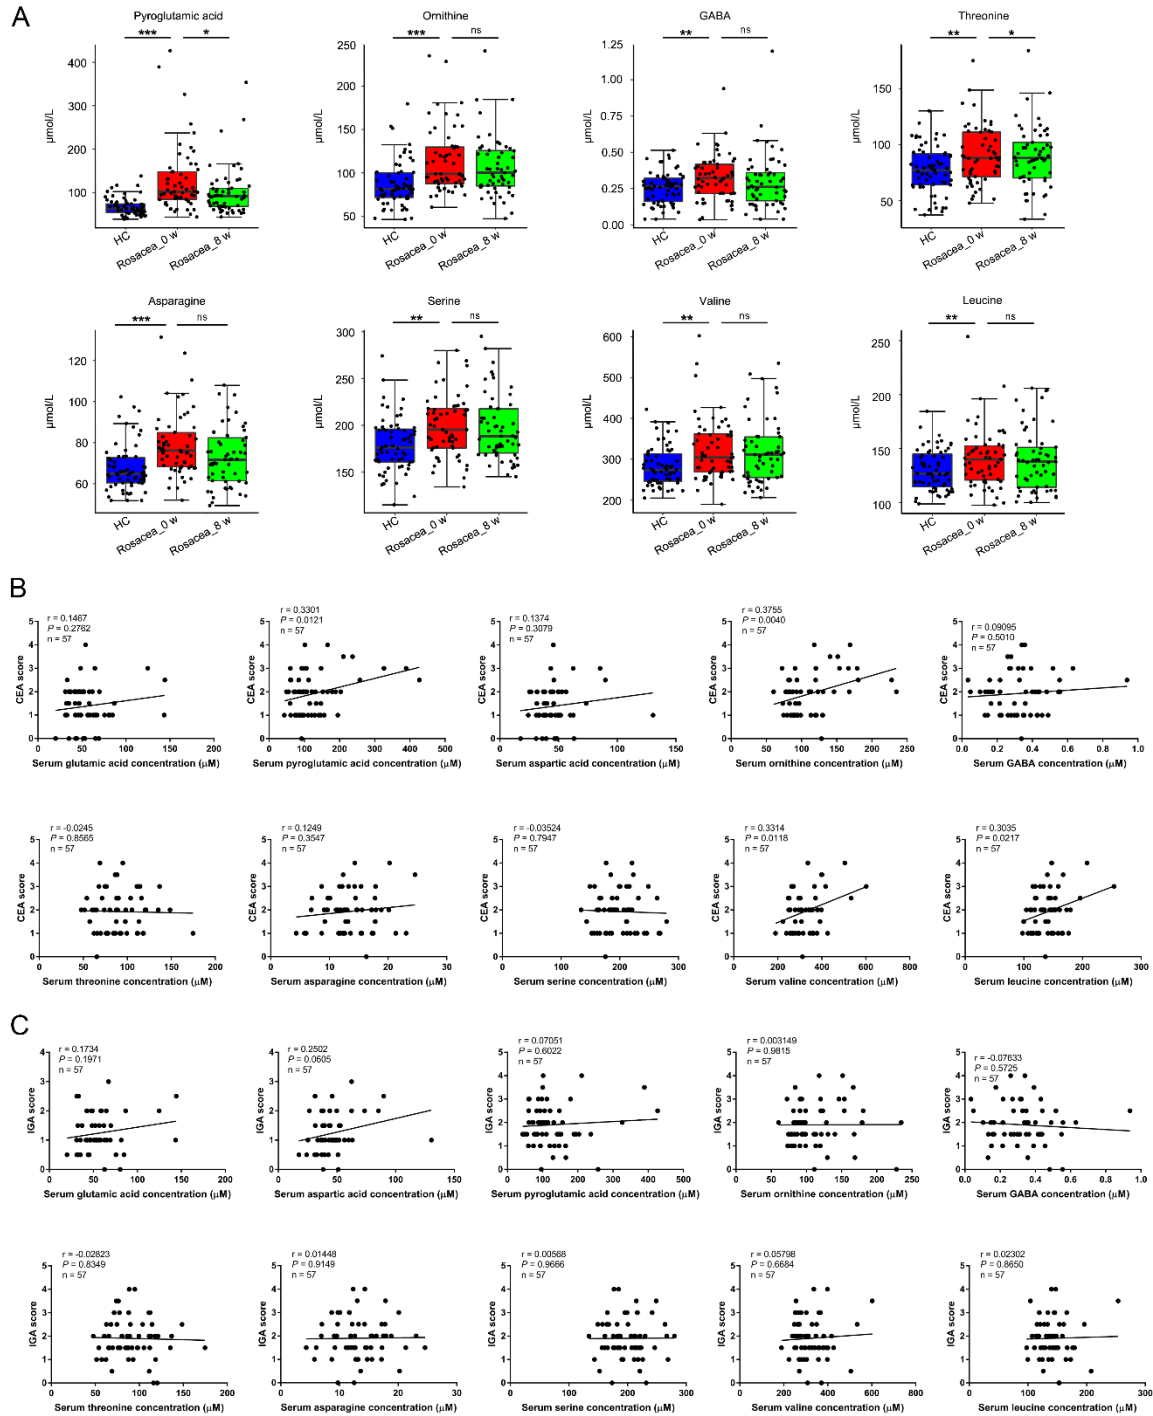

**Supplemental Figure 5. Expression changes of amino acids in serum after doxycycline treatment in patients with rosacea.**

(A) Boxplot of serum levels of top 10 differential amino acids in different groups except glutamic acid and aspartic acid. (B) Correlation of serum amino acid levels in rosacea patients after



doxycycline treatment with CEA scores. (C) Correlation of serum amino acid levels in rosacea patients after doxycycline treatment with IGA scores. Data represent the mean  $\pm$  SEM. \* $P < 0.05$ , \*\* $P < 0.01$ , \*\*\* $P < 0.001$ . One-way ANOVA with Bonferroni's *post hoc* test was used (A). Spearman's correlation test was used for the correlation analysis (B and C).

**Supplementary Table 1. Classification and expression changes of differential metabolites between rosacea patients and healthy controls.**

| Class                    | Metabolite              | HMDB         | P-value | log2FC  |
|--------------------------|-------------------------|--------------|---------|---------|
| Amino Acids<br>(30.2%)   | Arginine                | HMDB0000517  | 0.03331 | -0.1225 |
|                          | Asparagine              | HMDB0000168  | 1.8E-06 | 0.2305  |
|                          | Aspartic acid           | HMDB0000191  | 6.7E-11 | 0.6028  |
|                          | GABA                    | HMDB0000112  | 0.00759 | 0.2756  |
|                          | Glutamic acid           | HMDB0000148  | 7.9E-13 | 0.6834  |
|                          | Histidine               | HMDB0000177  | 0.0013  | 0.0871  |
|                          | Leucine                 | HMDB0000687  | 0.02919 | 0.1417  |
|                          | Lysine                  | HMDB0000182  | 0.04359 | 0.0646  |
|                          | Ornithine               | HMDB0000214  | 5.5E-06 | 0.2772  |
|                          | Pyroglutamic acid       | HMDB0000267  | 7E-11   | 0.6954  |
|                          | Serine                  | HMDB0000187  | 0.00059 | 0.1539  |
|                          | Threonine               | HMDB0000167  | 0.00228 | 0.2308  |
|                          | Valine                  | HMDB0000883  | 0.001   | 0.1521  |
| Benzenoid<br>(2.3%)      | Phenylpyruvic acid      | HMDB0000205  | 8E-05   | -0.6661 |
| Carbohydrates<br>(16.3%) | Erythronic acid         | HMDB0000613  | 3.2E-15 | 0.9981  |
|                          | Glucose                 | HMDB0000122  | 0.01002 | -0.0975 |
|                          | Glyceric acid           | HMDB0000139  | 3.2E-14 | 0.6847  |
|                          | N-Acetylneuraminic acid | HMDB0000230  | 1.9E-06 | 0.3594  |
|                          | Ribulose                | HMDB0000621  | 1.9E-05 | 0.3349  |
|                          | Threonic acid           | HMDB0000943  | 9E-12   | 1.2350  |
|                          | Xylulose                | HMDB0001644  | 5.3E-05 | 0.3887  |
| Carnitines<br>(2.3%)     | Oleylcarnitine          | HMDB00005065 | 0.03038 | 0.3094  |
| Fatty Acids              | 10Z-Heptadecenoic acid  | HMDB0060038  | 0.00058 | 0.5959  |
|                          | Adrenic acid            | HMDB0002226  | 9.9E-05 | 0.4812  |
|                          | Arachidonic acid        | HMDB0001043  | 1.8E-09 | 0.4926  |
|                          | Citraconic acid         | HMDB0000634  | 0.0011  | -0.1043 |
|                          | DHA                     | HMDB0002183  | 0.00112 | 0.2879  |
|                          | Dihomo-gamma-linolenic  | HMDB0002925  | 9.4E-06 | 0.5602  |

|                          |                        |             |         |        |
|--------------------------|------------------------|-------------|---------|--------|
| (27.9%)                  | acid                   |             |         |        |
|                          | DPAAn-6                | HMDB0001976 | 0.00509 | 0.6561 |
|                          | gamma-Linolenic acid   | HMDB0003073 | 0.00167 | 0.2942 |
|                          | Linoleic acid          | HMDB0000673 | 0.00012 | 0.3606 |
|                          | Myristic acid          | HMDB0000806 | 0.00088 | 0.4523 |
|                          | Oleic acid             | HMDB0000207 | 0.00222 | 0.2203 |
|                          | Palmitoleic acid       | HMDB0003229 | 0.00041 | 0.4569 |
| Organic Acids<br>(18.6%) | 2-Hydroxyglutaric acid | HMDB0000606 | 1.9E-05 | 0.6511 |
|                          | Aconitic acid          | HMDB0000072 | 0.00048 | 0.2316 |
|                          | Fumaric acid           | HMDB0000134 | 0.0024  | 0.5928 |
|                          | Lactic acid            | HMDB0000190 | 3.2E-10 | 0.4535 |
|                          | Maleic acid            | HMDB0000176 | 7.7E-06 | 0.4856 |
|                          | Malic acid             | HMDB0000156 | 8E-11   | 0.7251 |
|                          | Oxoglutaric acid       | HMDB0000208 | 0.00067 | 0.2250 |
|                          | Succinic acid          | HMDB0000254 | 0.00462 | 0.2224 |
| Phenols<br>(2.3%)        | Homovanillic acid      | HMDB0000118 | 0.00274 | 0.2393 |

**Supplementary Table 2. Expression changes of differential amino acids between rosacea patients and healthy controls from the validation cohort.**

| Class       | Metabolite    | HMDB        | P-value  | log2FC  |
|-------------|---------------|-------------|----------|---------|
| Amino Acids | Arginine      | HMDB0000517 | 0.0438   | -0.2691 |
|             | Aspartic acid | HMDB0000191 | 3.55E-05 | 0.4411  |
|             | Citrulline    | HMDB0000904 | 0.01115  | -0.2542 |
|             | Glutamic acid | HMDB0000148 | 0.00015  | 0.4879  |
|             | Phenylalanine | HMDB0000159 | 0.00035  | 0.1524  |
|             | Serine        | HMDB0000187 | 0.00749  | 0.1458  |
|             | Tryptophan    | HMDB0000929 | 0.03176  | -0.1317 |

**Supplementary Table 3. Classification and expression changes of differential metabolites between 8 weeks and 0 weeks after doxycycline treatment in rosacea patients.**

| Class                   | Metabolite          | HMDB        | P-value | log2FC  |
|-------------------------|---------------------|-------------|---------|---------|
| Amino Acids<br>(21.1%)  | Asparagine          | HMDB0000168 | 0.04668 | -0.0889 |
|                         | Aspartic acid       | HMDB0000191 | 0.00126 | -0.2027 |
|                         | Glutamic acid       | HMDB0000148 | 0.00512 | -0.232  |
|                         | Pyroglutamic acid   | HMDB0000267 | 0.01306 | -0.1536 |
| Benzoic Acids<br>(5.3%) | m-Aminobenzoic acid | HMDB0001891 | 0.04544 | 0.0946  |
| Bile Acids              | CA                  | HMDB0000619 | 0.02557 | -0.8291 |

|                          |                         |             |          |         |
|--------------------------|-------------------------|-------------|----------|---------|
| (10.5%)                  | UDCA                    | HMDB0000946 | 0.03912  | -0.3128 |
| Carbohydrates<br>(31.6%) | Erythronic acid         | HMDB0000613 | 0.0419   | -0.1993 |
|                          | Fructose                | HMDB0000660 | 0.01094  | -0.2864 |
|                          | Glyceric acid           | HMDB0000139 | 0.01306  | -0.238  |
|                          | N-Acetylneuraminic acid | HMDB0000230 | 0.01245  | -0.215  |
|                          | Tartaric acid           | HMDB0000956 | 0.00105  | 0.2597  |
|                          | Threonic acid           | HMDB0000943 | 0.02997  | -0.1824 |
| Organic Acids<br>(26.3%) | Lactic acid             | HMDB0000190 | 0.01059  | -0.2131 |
|                          | Maleic acid             | HMDB0000176 | 0.0062   | -0.3086 |
|                          | Malic acid              | HMDB0000156 | 0.02519  | -0.3026 |
|                          | Oxoglutaric acid        | HMDB0000208 | 0.031278 | -0.2385 |
|                          | Pyruvic acid            | HMDB0000243 | 0.03218  | -0.2423 |
| SCFAs<br>(5.3%)          | Isocaproic acid         | HMDB0000689 | 0.04464  | -0.2025 |

**Supplementary Table 4. Differentially-expressed, doxycycline-target genes associated with glutamic acid and aspartic acid by multiomics analysis.**

| <b>Genes</b> | <b>Target</b>                  | <b>P-value</b> | <b>log2FC</b> |
|--------------|--------------------------------|----------------|---------------|
| ADORA2A      | Glutamic acid                  | 0.01317        | 1.171         |
| AKT1         | Glutamic acid                  | 0.00135        | 2.3883        |
| ANPEP        | Glutamic acid                  | 1.08E-07       | -6.8843       |
| APH1A        | Aspartic acid                  | 5.91E-05       | -3.2804       |
| BAX          | Glutamic acid                  | 1.67E-06       | -4.5183       |
| BCL2         | Aspartic acid<br>Glutamic acid | 5.53E-06       | 3.8918        |
| BST1         | Glutamic acid                  | 0.00368        | 4.3019        |
| CBS          | Glutamic acid                  | 0.0011         | 2.2627        |
| CDK5         | Glutamic acid                  | 3.39E-06       | -5.8171       |
| CHRNA4       | Glutamic acid                  | 0.00057        | 3.1444        |
| COMT         | Glutamic acid                  | 0.00053        | -2.2979       |
| CYCS         | Glutamic acid                  | 5.38E-06       | -3.4732       |
| DHFR         | Glutamic acid                  | 0.00101        | 1.9473        |
| DNPEP        | Glutamic acid                  | 2.01E-06       | -4.9377       |
| FGFR1        | Glutamic acid                  | 4.55E-06       | 6.4554        |
| FOS          | Glutamic acid                  | 0.01467        | -2.6362       |
| GRIA2        | Aspartic acid<br>Glutamic acid | 2.51E-05       | 4.8757        |
| GRIN1        | Aspartic acid<br>Glutamic acid | 0.00012        | 3.7986        |
| GRM5         | Glutamic acid                  | 0.00011        | 3.297         |

|         |                                |          |         |
|---------|--------------------------------|----------|---------|
| GSTO1   | Glutamic acid                  | 3.2E-06  | -5.7778 |
| GSTP1   | Glutamic acid                  | 0.00603  | -1.1703 |
| IL6     | Glutamic acid                  | 4.8E-07  | 7.475   |
| KMO     | Glutamic acid                  | 0.00116  | -1.9304 |
| LDHB    | Aspartic acid<br>Glutamic acid | 0.0056   | -2.0407 |
| LYZ     | Aspartic acid                  | 4.6E-05  | -3.4105 |
| MMP2    | Glutamic acid                  | 0.00011  | -8.1293 |
| NMNAT3  | Glutamic acid                  | 5.99E-06 | -4.7931 |
| NOS2    | Glutamic acid                  | 0.00854  | 5.1937  |
| NR3C1   | Glutamic acid                  | 9.77E-06 | -7.3827 |
| OTC     | Aspartic acid<br>Glutamic acid | 9.13E-05 | -5.8441 |
| PLA2G1B | Glutamic acid                  | 4.2E-05  | 5.5922  |
| PSEN1   | Aspartic acid                  | 0.00729  | -1.5423 |
| SIGMAR1 | Glutamic acid                  | 2.65E-08 | -9.0496 |
| SLC6A1  | Glutamic acid                  | 4.46E-07 | 7.2995  |
| SOD1    | Glutamic acid                  | 2.46E-07 | -5.9784 |
| SYN1    | Glutamic acid                  | 0.00137  | -2.4099 |
| TACR1   | Glutamic acid                  | 3.38E-06 | -6.1159 |
| TGFB2   | Glutamic acid                  | 9.21E-07 | 8.0598  |
| TGM2    | Glutamic acid                  | 8.09E-08 | -7.4568 |
| TP53    | Glutamic acid                  | 5.02E-07 | -6.2877 |
| TRPV1   | Glutamic acid                  | 1.45E-06 | 7.0917  |

**Supplementary Table 5**

| qPCR primers                   |                        |
|--------------------------------|------------------------|
| Human- <i>GAPDH</i> -F         | TGTTGCCATCAATGACCCCTT  |
| Human- <i>GAPDH</i> -R         | CTCCACGACGTACTIONCAGCG |
| Human- <i>VIP</i> -F           | GACACCAGAAATAAGGCCAG   |
| Human- <i>VIP</i> -R           | GTCACCCAACCTGAGAGCAG   |
| Human- <i>PACAP</i> -F         | CAGACCCTGAGAACCTACGC   |
| Human- <i>PACAP</i> -R         | CTGGCTGGTTTGTCTGTTGC   |
| Human- <i>CGRP</i> $\alpha$ -F | AAGCGGTGCGTAATCTGAG    |
| Human- <i>CGRP</i> $\alpha$ -R | GGGGAACGTGTGAACTTGTTG  |
| Human- <i>CGRP</i> $\beta$ -F  | ACCCGGCCACACTCAGTAA    |
| Human- <i>CGRP</i> $\beta$ -R  | GGGCACGAAGTTGCTCTTCA   |
| Human- <i>VPAC1</i> -F         | TCATCCGAATCCTGCTTCAGA  |

|                                          |                         |
|------------------------------------------|-------------------------|
| Human- <i>VPAC1</i> -R                   | AGGCGAACATGATGTAGTGTACT |
| Human- <i>VPAC2</i> -F                   | CAGTGGCGTCTGGGACAAC     |
| Human- <i>VPAC2</i> -R                   | CCGTCACTCGTACAGTTTTTGC  |
| Mouse- <i>Gapdh</i> -F                   | AGGTCGGTGTGAACGGATTTG   |
| Mouse- <i>Gapdh</i> -R                   | TGTAGACCATGTAGTTGAGGTCA |
| Mouse- <i>Vip</i> -F                     | AGTGTGCTGTTCTCTCAGTCG   |
| Mouse- <i>Vip</i> -R                     | GCCATTTTCTGCTAAGGGATTCT |
| Mouse- <i>Adcyap1</i> -F                 | ACCATGTGTAGCGGAGCAAG    |
| Mouse- <i>Adcyap1</i> -R                 | CTGGTCGTAAGCCTCGTCT     |
| Mouse- <i>Calca</i> -F                   | GAGGGCTCTAGCTTGGACAG    |
| Mouse- <i>Calca</i> -R                   | AAGGTGTGAAACTTGTTGAGGT  |
| Mouse- <i>Calcb</i> -F                   | CTCTCAGCACGATATGGGTCC   |
| Mouse- <i>Calcb</i> -R                   | GCAAGAGATGTTTTTCCTGGTCG |
| Mouse- <i>Tnf-<math>\alpha</math></i> -F | CCCTCACACTCAGATCATCTTCT |
| Mouse- <i>Tnf-<math>\alpha</math></i> -R | GCTACGACGTGGGCTACAG     |
| Mouse- <i>Il1<math>\beta</math></i> -F   | GCAACTGTTCCCTGAACTCAACT |
| Mouse- <i>Il1<math>\beta</math></i> -R   | ATCTTTTGGGGTCCGTCAACT   |
| Mouse- <i>Il6</i> -F                     | TAGTCCTTCCTACCCCAATTTCC |
| Mouse- <i>Il6</i> -R                     | TTGGTCCTTAGCCACTCCTTC   |
| Mouse- <i>Cxcl9</i> -F                   | GGAGTTCGAGGAACCCTAGTG   |
| Mouse- <i>Cxcl9</i> -R                   | GGGATTTGTAGTGGATCGTGC   |
| Mouse- <i>Ccl20</i> -F                   | GCCTCTCGTACATACAGACGC   |
| Mouse- <i>Ccl20</i> -R                   | CCAGTTCTGCTTTGGATCAGC   |

Full unedited blot for Figure 4D

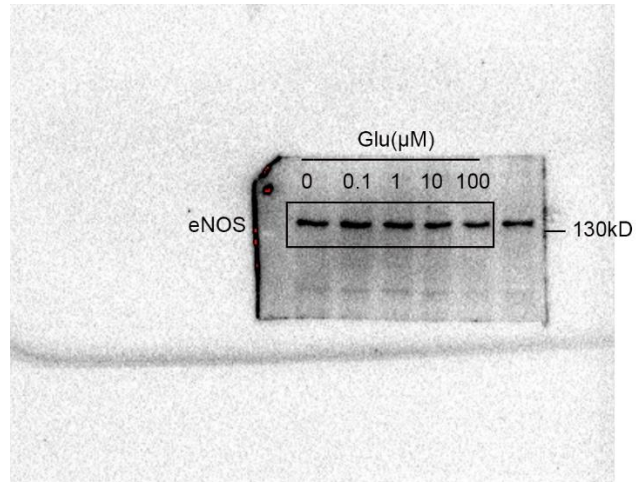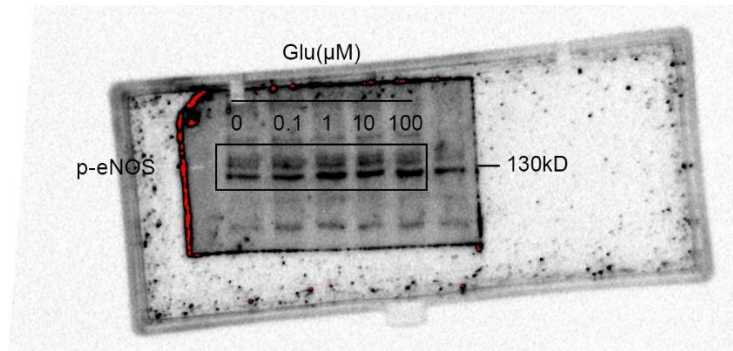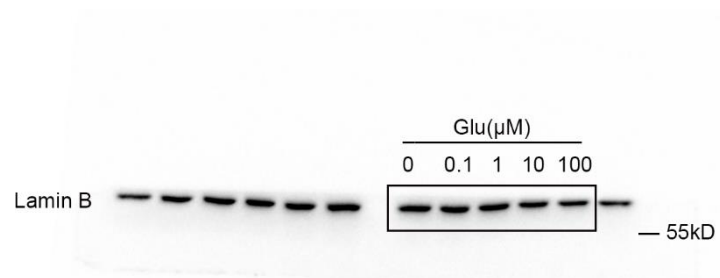

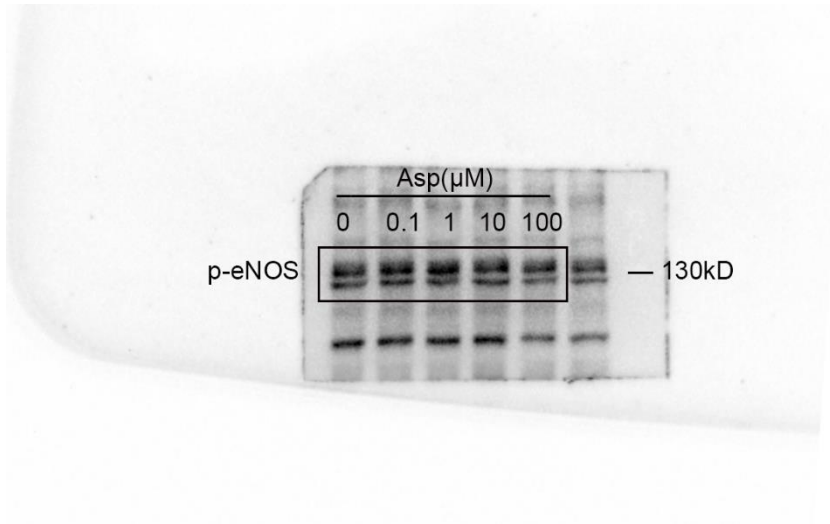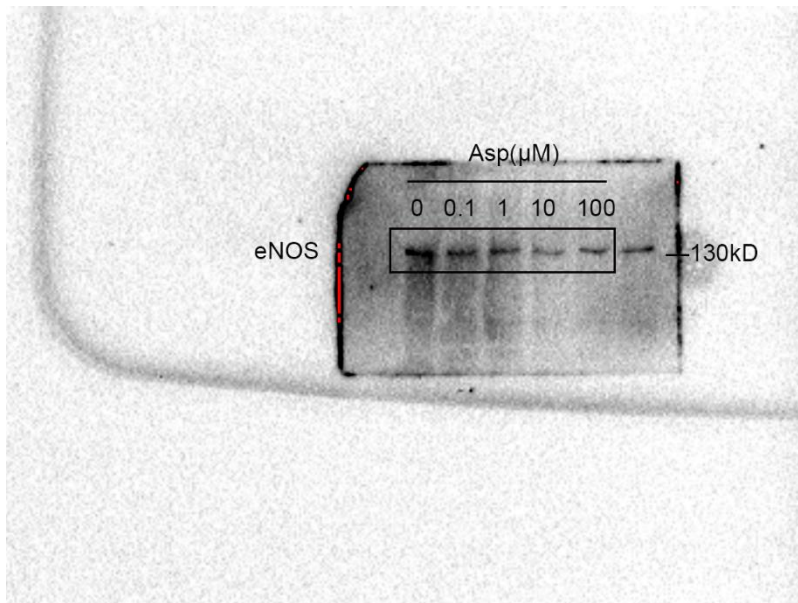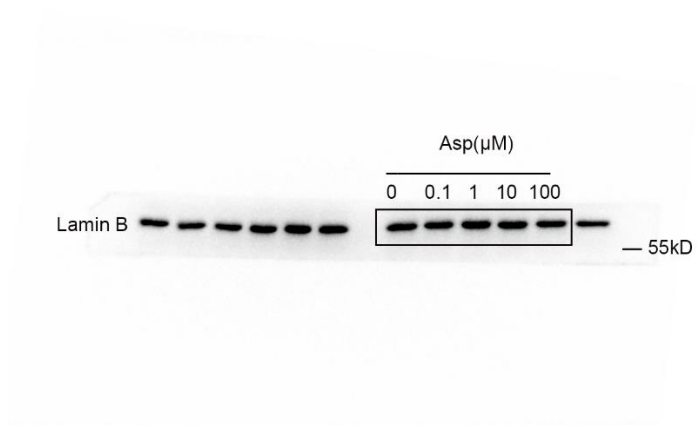

**Full unedited blot for Figure 4G**

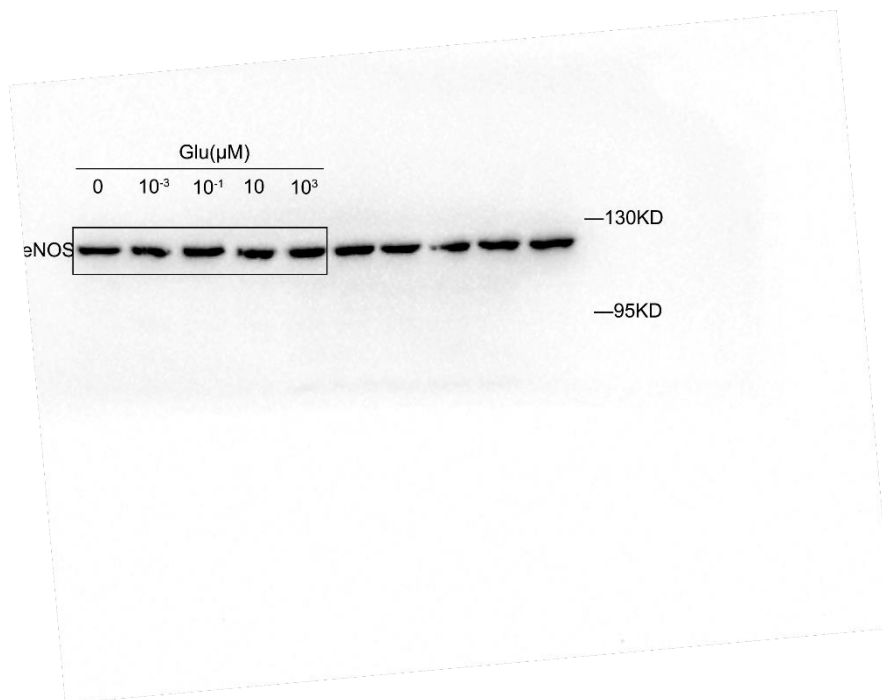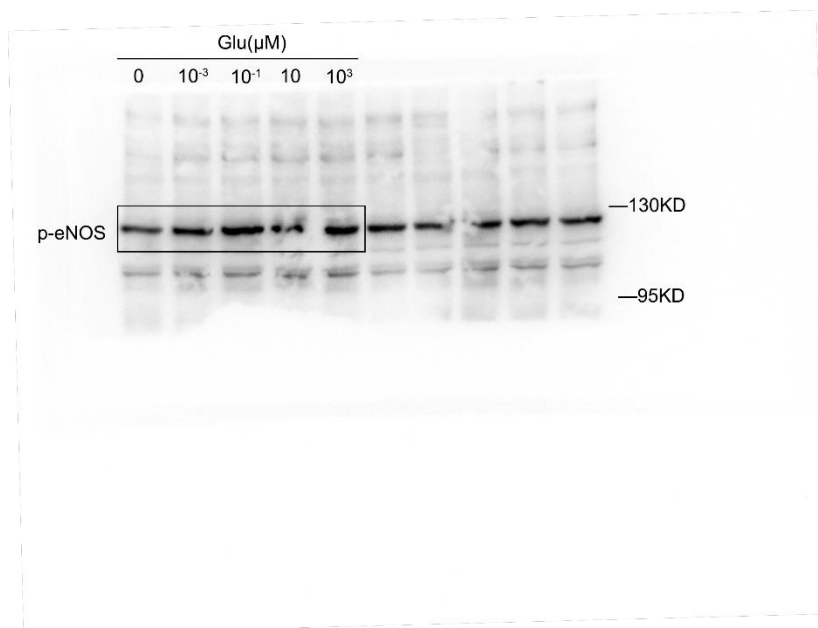



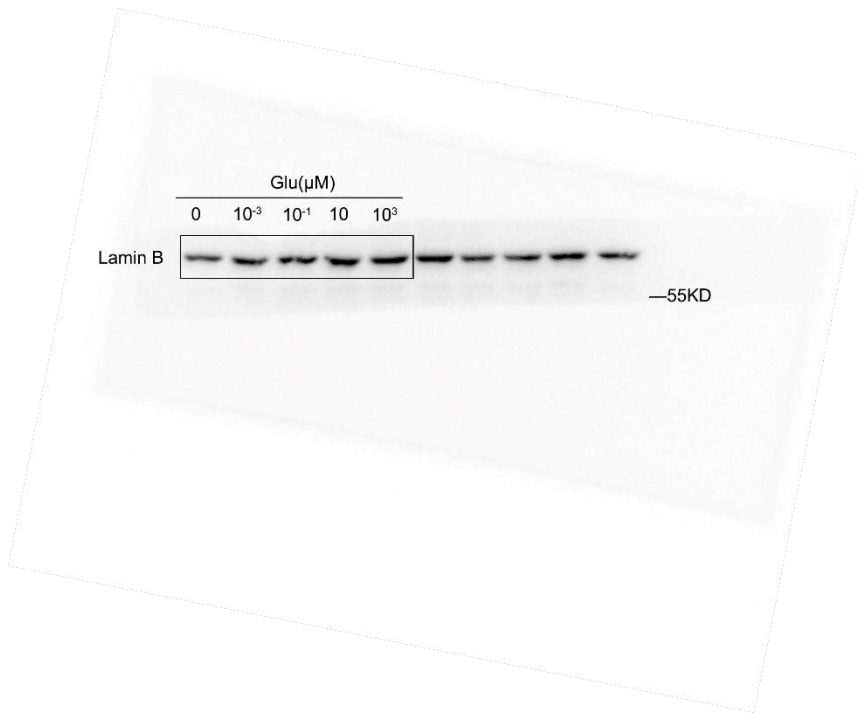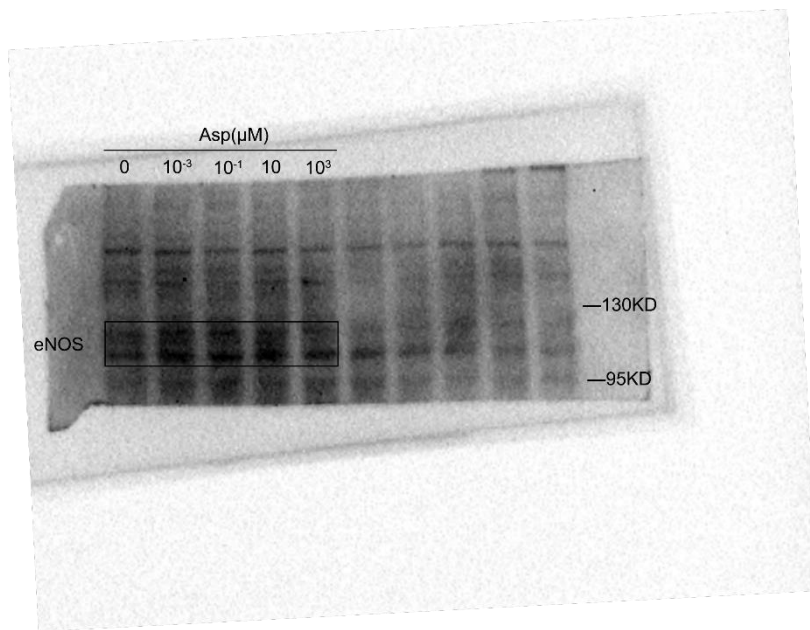

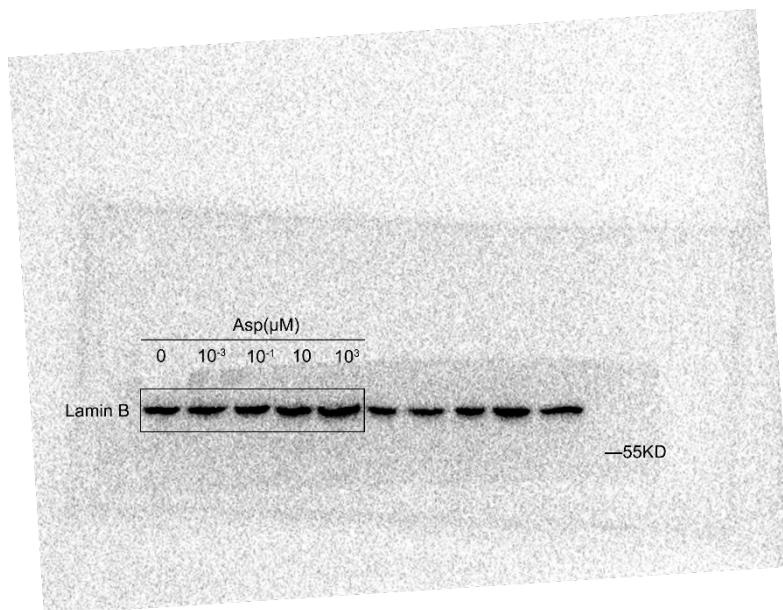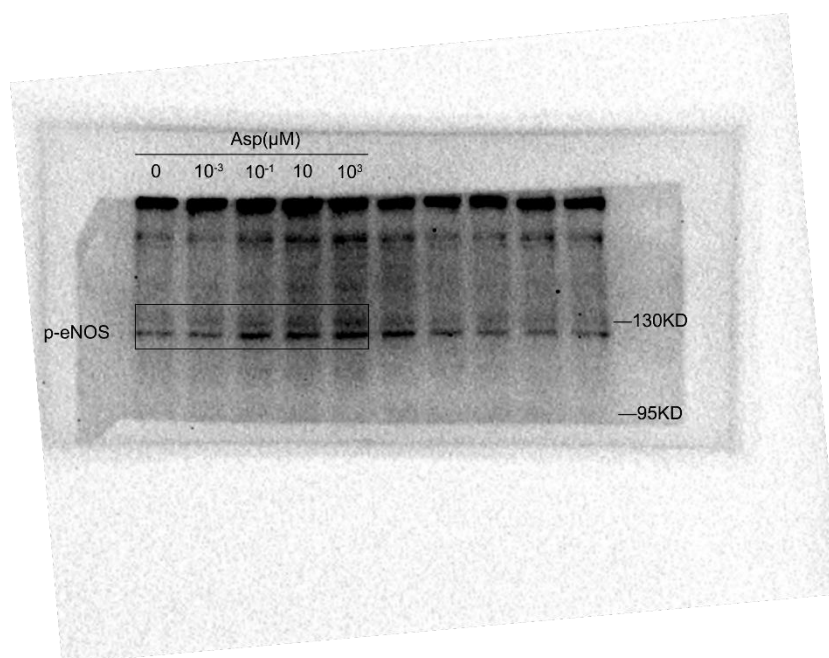

**Full unedited blot for Figure 5A**

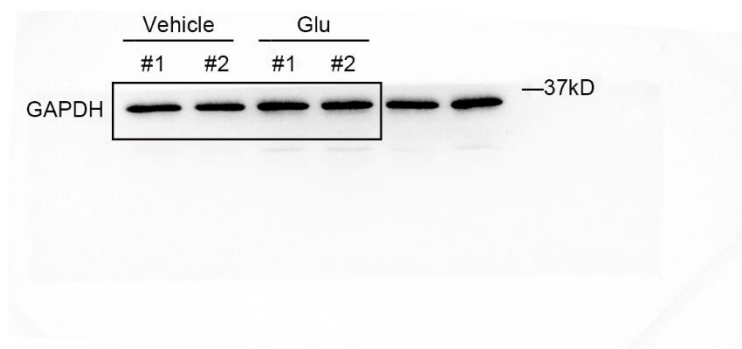

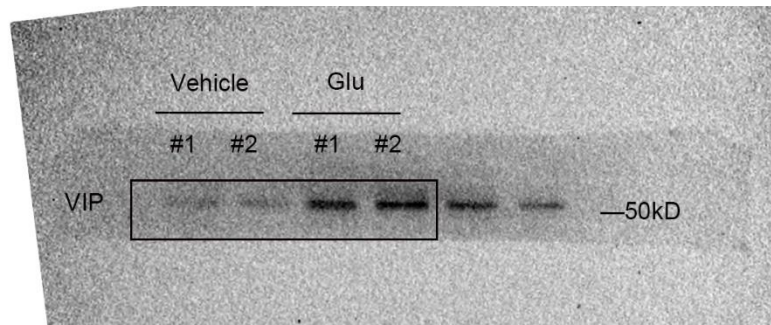

Full unedited blot for Figure 5B

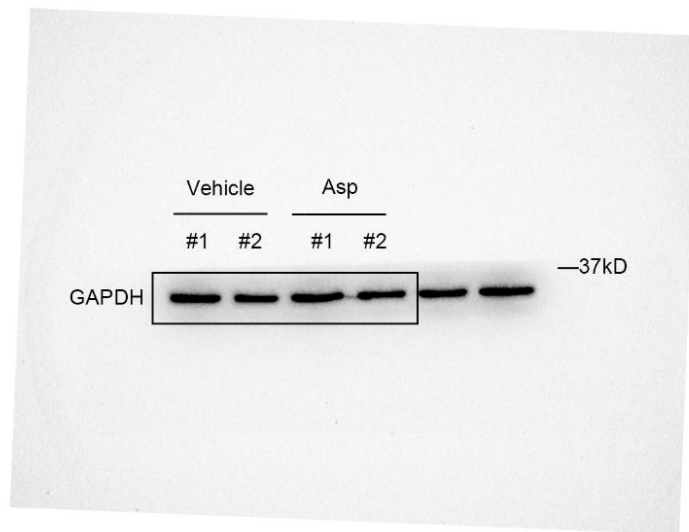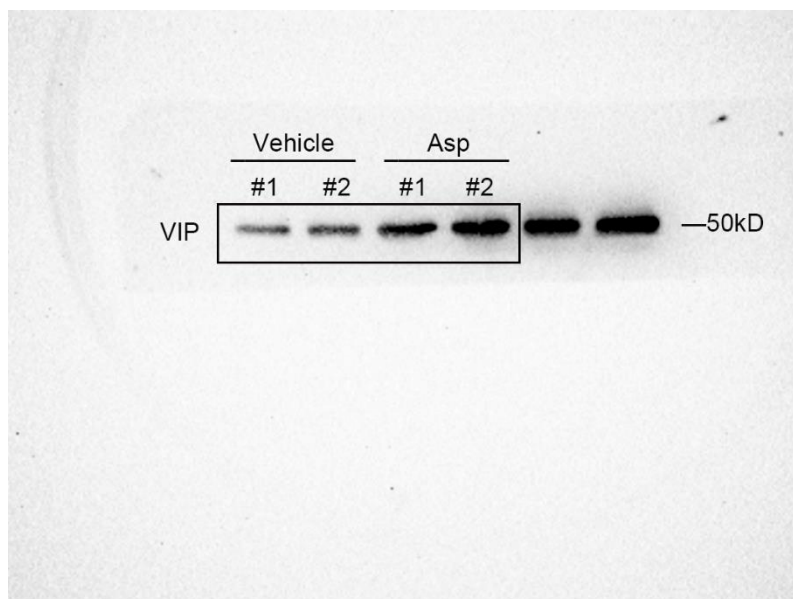

Full unedited blot for Figure 5F

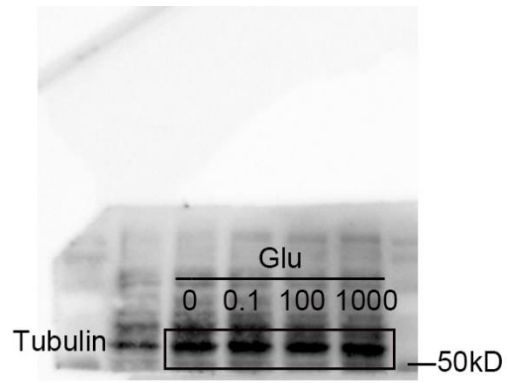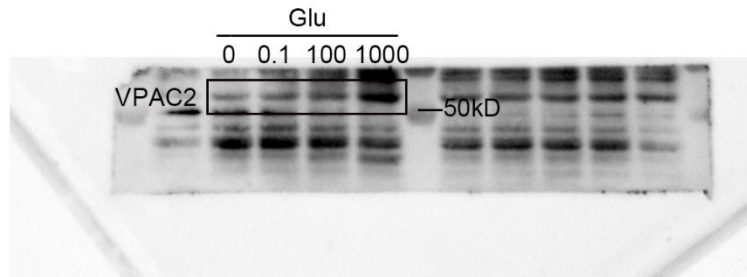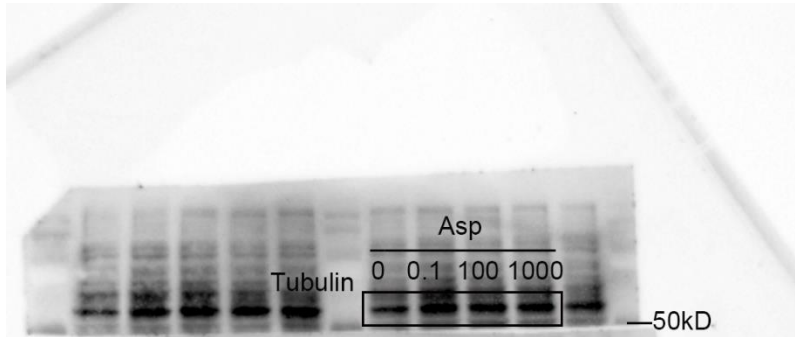

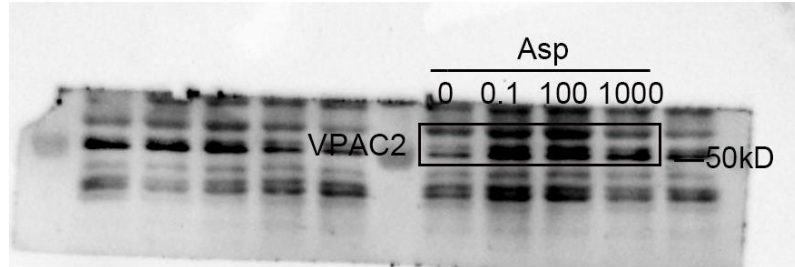

**Full unedited blot for Supplementary Figure 3A**

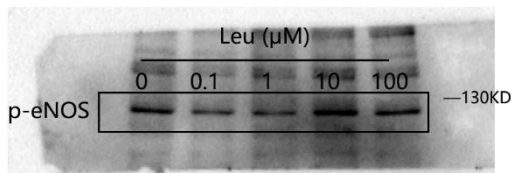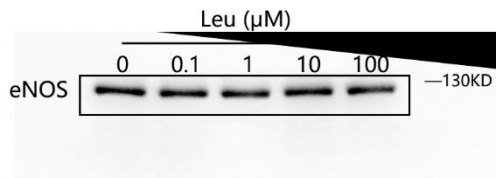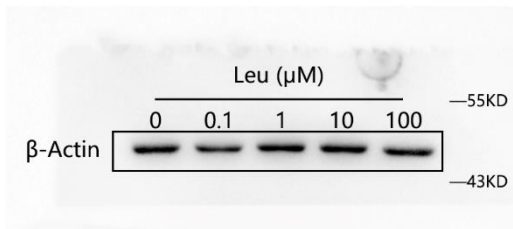

**Full unedited blot for Supplementary Figure 3D**

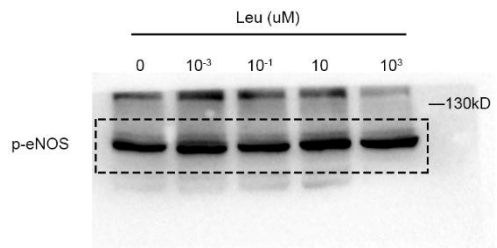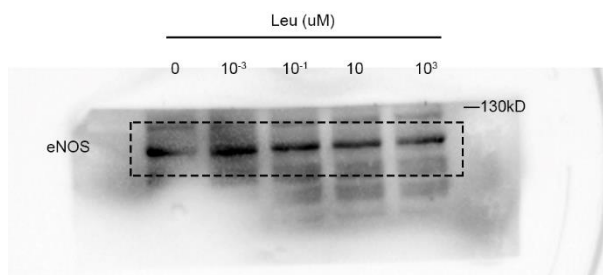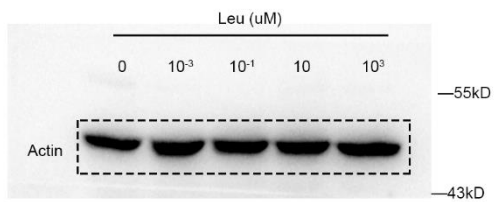

Supplement: sd1 [file 1]
